# Supplementary material
Source: Frontiers journal article supplement (https://www.frontiersin.org/articles/486284)
Supplement: Table_3.XLSX [file Table_3.XLSX]

## Sheet: TABLE S3
Table S3 The top enriched GO terms in three compared groups.
	day 0 vs days 6		days 6 vs days 8		days 8 vs days 12
GO category	Gene Ontology term	Corrected P-value	Gene Ontology term	Corrected P-value	Gene Ontology term	Corrected P-value
Biological processes			chitin metabolic process	0.00172	viral transcription	6.76e-11
			glucosamine-containing compound metabolic process	0.00224	symbiosis, encompassing mutualism through parasitism	4.25e-10
			amino sugar metabolic process	0.0033	viral gene expression	6.01e-10
					interspecies interaction between organisms	6.82e-09
					peptide metabolic process	8.2e-09
					peptide biosynthetic process	5.19e-08
					cellular amide metabolic process	5.61e-08
					translation	6.79e-08
					SRP-dependent cotranslational protein targeting to membrane	6.8e-08
					protein targeting to ER	8.11e-08
					establishment of protein localization to endoplasmic reticulum	8.11e-08
					cotranslational protein targeting to membrane	1.04e-07
					protein targeting to membrane	1.15e-07
					amide biosynthetic process	2.33e-07
					nuclear-transcribed mRNA catabolic process, nonsense-mediated decay	3.32e-07
					protein localization to endoplasmic reticulum	3.34e-07
					viral process	5.06e-07
					rRNA processing	1.09e-06
					rRNA metabolic process	1.41e-06
					multi-organism process	1.78e-06
					establishment of protein localization to membrane	2.61e-06
					translational initiation	3.38e-06
					ribosome biogenesis	4.71e-05
					protein localization to membrane	7.35e-05
					establishment of protein localization to organelle	0.00016
					nuclear-transcribed mRNA catabolic process	0.00019
					ribonucleoprotein complex biogenesis	0.0004
					mRNA catabolic process	0.00065
					protein localization to organelle	0.00152
					protein targeting	0.00161
					anatomical structure development	0.00279
					RNA catabolic process	0.0044
Cellular component			intrinsic component of membrane	5.4e-07	cytosolic ribosome	5.88e-17
			integral component of membrane	7.98e-07	cytosolic part	5.14e-15
			membrane part	1.69e-05	ribosomal subunit	8.98e-15
			membrane	0.00031	cytosolic large ribosomal subunit	9.45e-11
					ribosome	6.58e-09
					large ribosomal subunit	1.35e-08
					cytosolic small ribosomal subunit	2.6e-06
					intracellular ribonucleoprotein complex	2.55e-05
					ribonucleoprotein complex	2.55e-05
					small ribosomal subunit	4.55e-05
					cytosol	0.0004
					non-membrane-bounded organelle	0.00095
					intracellular non-membrane-bounded organelle	0.00095
					cell-substrate adherens junction	0.00109
					focal adhesion	0.00109
					cell-substrate junction	0.00109
					myofibril	0.00179
					sarcomere	0.00179
					contractile fiber part	0.00179
					contractile fiber	0.00441
					troponin complex	0.00476
					striated muscle thin filament	0.00476
					myofilament	0.00476
					adherens junction	0.00556
					membrane	0.01023
Molecular function	peptidase activity	0.00321	oxidoreductase activity, acting on paired donors, with incorporation or reduction of molecular oxygen, reduced ascorbate as one donor, and incorporation of one atom of oxygen	7.4e-09	structural molecule activity	7.38e-10
	oxidoreductase activity, acting on paired donors, with incorporation or reduction of molecular oxygen, reduced ascorbate as one donor, and incorporation of one atom of oxygen	0.00985	copper ion binding	4.8e-06	structural constituent of ribosome	2.15e-09
	galactokinase activity	0.01913	monooxygenase activity	0.0002	scavenger receptor activity	0.00857
	galactose binding	0.01913	oxidoreductase activity, acting on paired donors, with incorporation or reduction of molecular oxygen, reduced ascorbate as one donor, and incorporation of one atom of oxygen	0.00675	cargo receptor activity	0.0103
	chitin binding	0.02769	chitin binding	0.00739	oxidoreductase activity, acting on paired donors, with incorporation or reduction of molecular oxygen, reduced ascorbate as one donor, and incorporation of one atom of oxygen	0.02956
			serine-type endopeptidase inhibitor activity	0.01586
			peptidase inhibitor activity	0.04072
